# Supplementary material for: A gel-state 2D-NMR method for plant cell wall profiling and analysis: a model study with the amorphous cellulose and xylan from ball-milled cotton linters
Source: Royal Society of Chemistry journal article supplement (doi:10.1039/c3ra46338a), 2014-01-01
Supplement: c3ra46338a.pdf [file c3ra46338a.pdf]

## Supplementary materials:

Fig. S1 & S2

## Figure captions

**Fig. S1.** Anomeric region of 2D HSQC NMR spectra of cellulose and xylan model compounds in DMSO- $d_6$ /pyridine- $d_5$  (4:1)

**Fig. S2.** Non-anomeric region of 2D HSQC NMR spectra of cellulose and xylan model compounds in DMSO- $d_6$ /pyridine- $d_5$  (4:1)

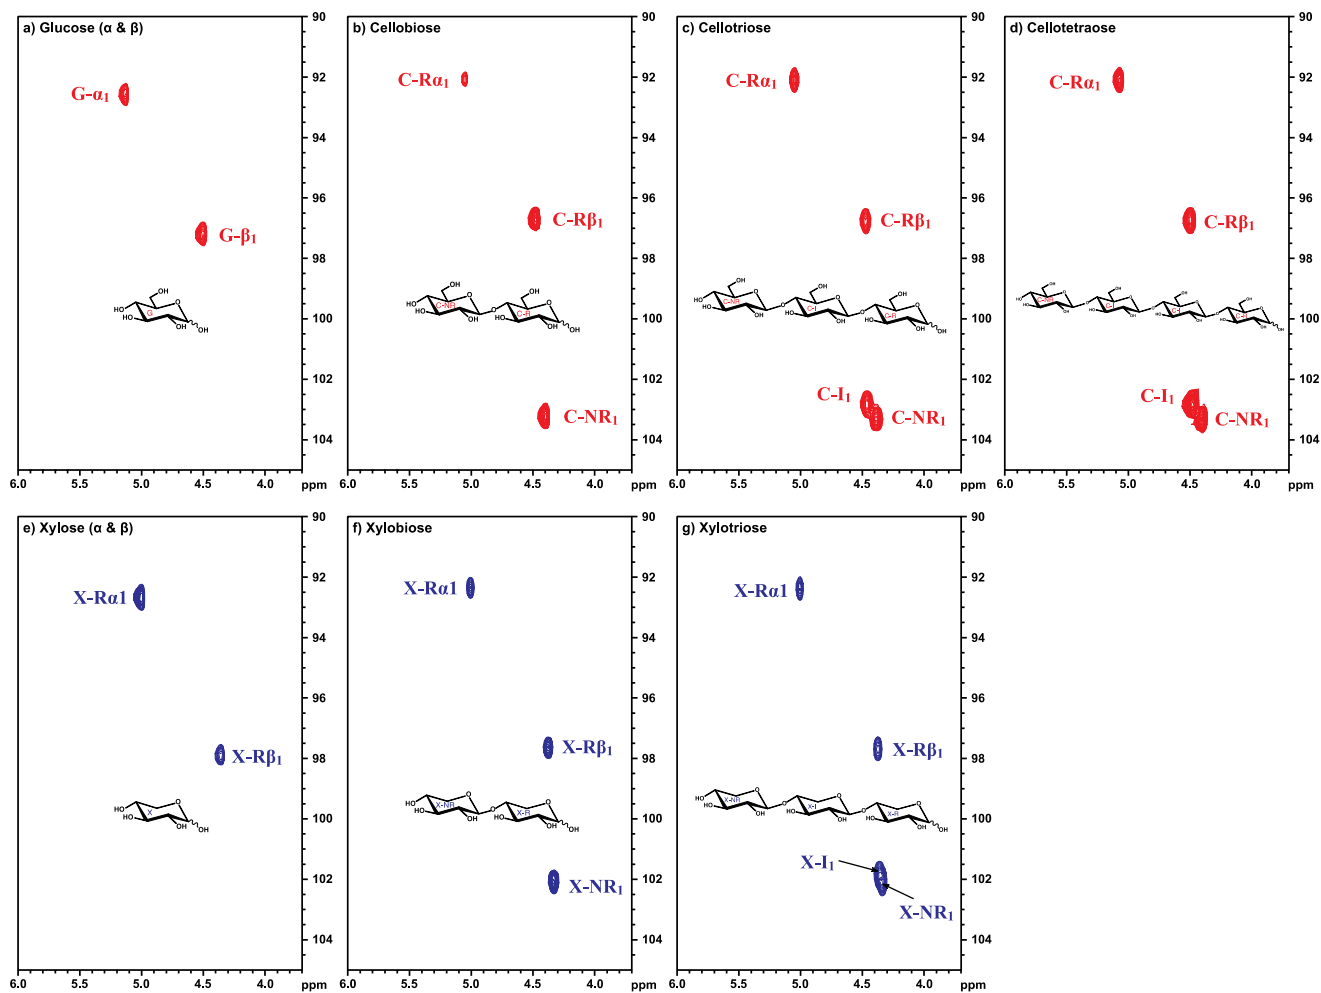

Fig. S1

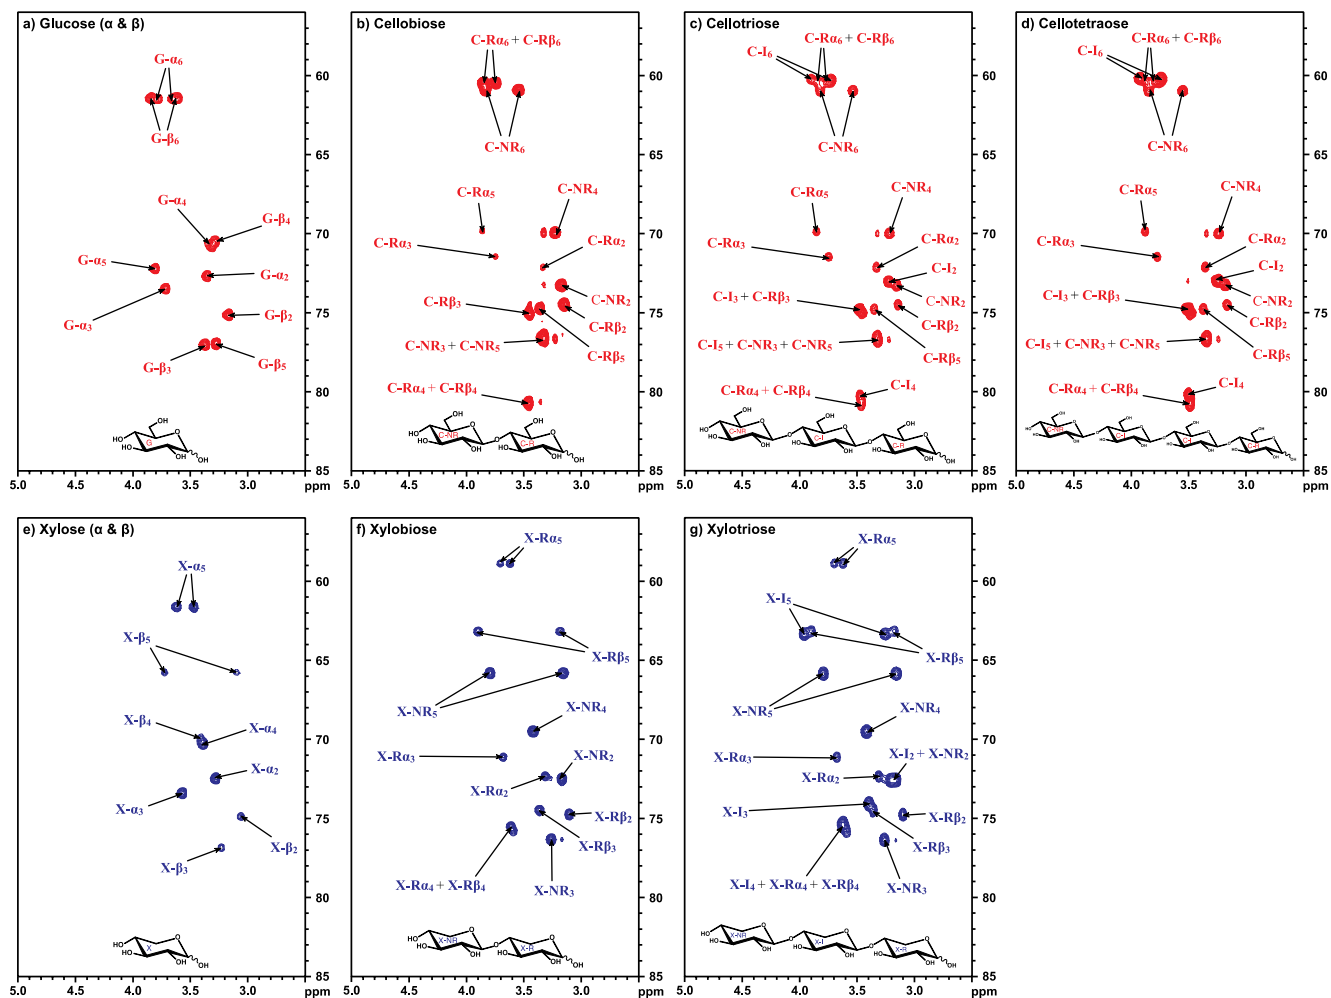

Fig. S2
